# Supplementary material for: Regulation of P53 signaling in breast cancer by the E3 ubiquitin ligase RNF187
Source: PubMed Central journal article supplement (PMC8844070; doi:10.1038/s41419-022-04604-3), 2022-02-14

# Report of Human Cell Line Authentication

Delivery Date: November 06<sup>th</sup>, 2017

Analysis Date: November 13<sup>th</sup>, 2017

## I .Sample

Sample Name: ‘XB6568’, labeled as ‘MCF-7’, was received on November 06<sup>th</sup>, 2017.

## II .Methodand Procedure

1. PCR is amplified with STR Multi-amplification Kit(Microreader™21 ID System);
2. PCR products are assayed with ABI 3730xl DNA Analyzer(Applied Biosystems®).
3. Data were analyzed using GeneMapper3.2 software and then compared with the ATCC and DSMZ databases for reference matching.

## III. Results

1. The results of the negative and positive control match expectations.
2. The STR profiles of the cell line sample are in the attached table and figure.

| Genetic Site | ATCC                                                   |    |  |  | Customer sample      |    |  |  |
|--------------|--------------------------------------------------------|----|--|--|----------------------|----|--|--|
| (Locus)      | Database profile:<br>MCF7Breast<br>AdenocarcinomaHuman |    |  |  | Query profile: MCF-7 |    |  |  |
| Amelogenin   | X                                                      |    |  |  | X                    |    |  |  |
| D5S818       | 11                                                     | 12 |  |  | 11                   | 12 |  |  |
| D13S317      | 11                                                     |    |  |  | 11                   |    |  |  |
| D7S820       | 8                                                      | 9  |  |  | 8                    | 9  |  |  |
| D16S539      | 11                                                     | 12 |  |  | 11                   | 12 |  |  |
| vWA          | 14                                                     | 15 |  |  | 14                   | 15 |  |  |
| TH01         | 6                                                      |    |  |  | 6                    |    |  |  |
| TPOX         | 9                                                      | 12 |  |  | 9                    | 12 |  |  |

|                                                                    |    |  |  |  |    |  |  |  |      |
|--------------------------------------------------------------------|----|--|--|--|----|--|--|--|------|
| CSF1PO                                                             | 10 |  |  |  | 10 |  |  |  |      |
| Number of shared alleles between query sample and database profile |    |  |  |  |    |  |  |  | 14   |
| Total number of alleles in the database profile                    |    |  |  |  |    |  |  |  | 14   |
| Percent match between the query and the database profile:          |    |  |  |  |    |  |  |  | 100% |

MCF-7: ①No cross-contamination of other human cell line is found.②The submitted profile is an 100% match for the following ATCC human cell line(s) in the ATCC STR database (8 core loci plus Amelogenin): MCF7Breast AdenocarcinomaHuman. 100% matched cell lines are found in DSMZ data bank. And the cell line named as MCF7 *etc.*

Operator: Rui Wang

Auditor: Bingjun Wu

Beijing Microread Genetics Co., Ltd

Notes:

1. Based on the ANSI Standard, cell lines with  $\geq 80\%$  match are considered to be related; i.e., derived from a common ancestry. Cell lines with between a 55% to 80% match require further profiling for authentication of relatedness.
2. The short tandem repeat (STR) profile generated by Beijing Microread Genetics Co., Ltd is indicative only of the sample sent to Beijing Microread Genetics Co., Ltd at the time it was sent. This data and analysis are for research use only.

Table: STR profiles of MCF-7 cell line

| Cell line MCF-7 (Fig.XB6568) |          |          |
|------------------------------|----------|----------|
| Marker                       | Allele 1 | Allele 2 |
| D19S433                      | 13       | 14       |
| D5S818                       | 11       | 12       |
| D21S11                       | 30       | 30       |
| D18S51                       | 14       | 14       |
| D6S1043                      | 12       | 18       |
| AMEL                         | X        | X        |
| D3S1358                      | 16       | 16       |
| D13S317                      | 11       | 11       |
| D7S820                       | 8        | 9        |
| D16S539                      | 11       | 12       |
| CSF1PO                       | 10       | 10       |
| Penta D                      | 12       | 12       |
| D2S441                       | 10       | 14       |
| vWA                          | 14       | 15       |
| D8S1179                      | 10       | 14       |
| TPOX                         | 9        | 12       |
| Penta E                      | 7        | 12       |
| TH01                         | 6        | 6        |
| D12S391                      | 18       | 20       |
| D2S1338                      | 21       | 23       |
| FGA                          | 23       | 25       |

Figure: STR profiles of MCF-7 cell line

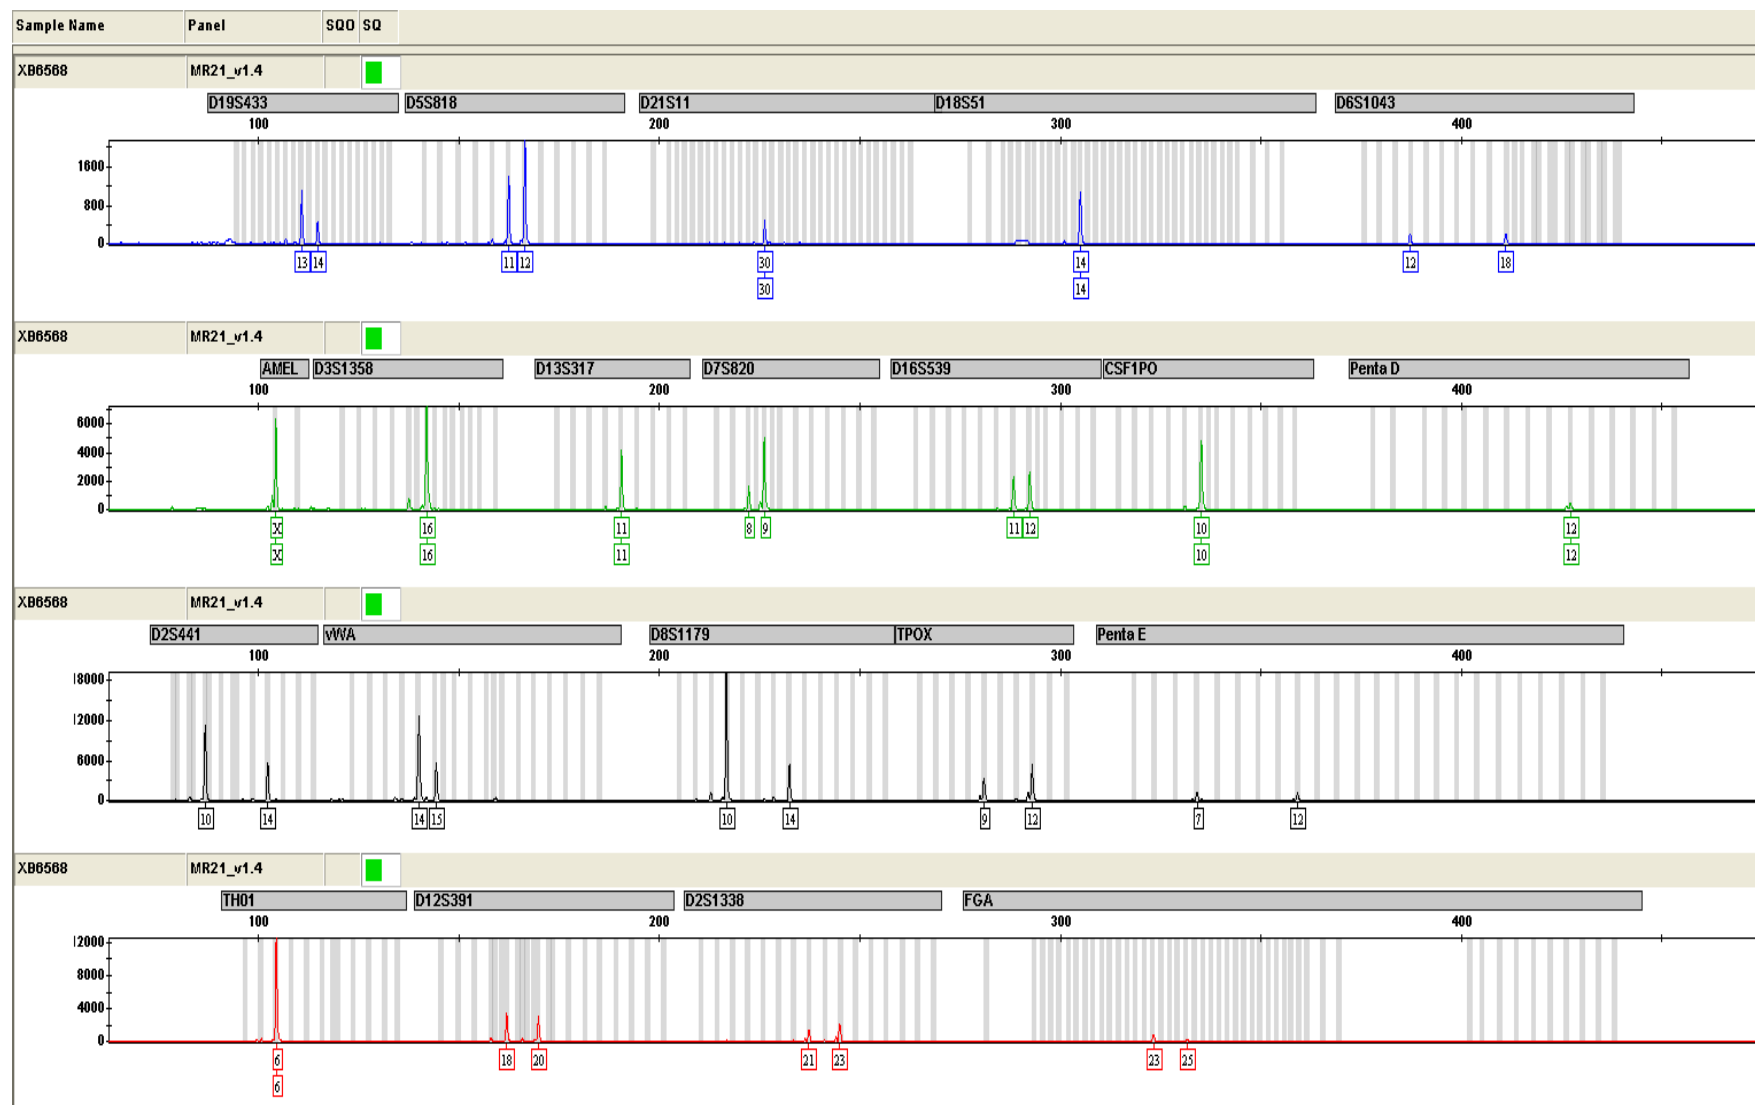

## 细胞 STR 检验报告

委托方：新乡医学院检验学院

委托日期：2017 年 11 月 06 日

鉴定日期：2017 年 11 月 13 日

### 一、 检材：

2017 年 11 月 06 日收到委托人 1 株细胞悬液：

编号为“XB6570”，包装上标记为“HEK293”。

要求鉴定该株细胞是否为单一来源细胞系，是否存在交叉污染现象。

### 二、 检材处理和检验方法：

取适量检材用 Microread Genomic DNA Kit 提取 DNA，采用 Microreader™21 ID System 扩增 20 个 STR 位点和性别鉴定位点，使用 ABI 3730xl 型遗传分析仪进行 PCR 产物检测，使用 GeneMapper3.2 软件(Applied Biosystems)对检测结果进行分析，并与 ATCC 和 DSMZ 数据库进行比对。

### 三、 检验结果：

实验中阴性及阳性对照结果均正确。

该细胞株的 STR 位点和 Amelogenin 位点的基因分型结果见附表，分型图谱见附图。

| Genetic Site | ATCC                                           |     |  |  | 检测样品         |     |  |  |
|--------------|------------------------------------------------|-----|--|--|--------------|-----|--|--|
| (Locus)      | 数据库名称：<br>HEK-293.2susEmbryonic<br>KidneyHuman |     |  |  | 样品名称: HEK293 |     |  |  |
| Amelogenin   | X                                              |     |  |  | X            |     |  |  |
| D5S818       | 8                                              |     |  |  | 8            |     |  |  |
| D13S317      | 12                                             | 14  |  |  | 12           | 14  |  |  |
| D7S820       | 11                                             | 12  |  |  | 11           |     |  |  |
| D16S539      | 9                                              | 13  |  |  | 9            | 13  |  |  |
| vWA          | 16                                             | 19  |  |  | 16           | 19  |  |  |
| TH01         | 7                                              | 9.3 |  |  | 7            | 9.3 |  |  |
| TPOX         | 11                                             |     |  |  | 11           |     |  |  |

|                |    |  |  |  |    |  |  |  |     |
|----------------|----|--|--|--|----|--|--|--|-----|
| CSF1PO         | 12 |  |  |  | 12 |  |  |  |     |
| 所有匹配峰的个数       |    |  |  |  |    |  |  |  | 13  |
| ATCC 数据库所有峰的个数 |    |  |  |  |    |  |  |  | 14  |
| 匹配度            |    |  |  |  |    |  |  |  | 93% |

#### 四、 分析说明：

该细胞 DNA 扩增后图谱清晰，分型结果良好。

#### 五、 检验结论：

HEK293:①该株细胞 DNA 进行细胞 STR 分型结果显示，在各基因座均未出现三等位基因现象。细胞中没有发现人类细胞交叉污染。② HEK293 细胞与 ATCC 中 HEK-293.2susEmbryonic KidneyHuman 细胞的 STR 数据匹配率为 93%，推测此样品为 HEK-293.2susEmbryonic KidneyHuman 的衍生细胞。③该株细胞 DNA 分型在 DSMZ 细胞库中未找到与其细胞分型 100%相匹配的细胞。

（此结果仅对本次检材负责）

操作人：王蕊

审核人：吴炳君

北京阅微基因技术有限公司

#### 备注：

1. 根据 ANSI 制定的国际标准，细胞系的匹配度 $\geq 80\%$  时，认为它们具有相关性，即衍生于共同的祖先细胞；匹配度在 55% 至 80% 之间，需要进一步验证相关性；小于 55%，表明两者不具有相关性。

2. 有效峰为真实的 PCR 条带；小峰和非特异性条带在计算中忽略不计。

本实验依照 Microreader™21 ID System STR 试剂盒提供的实验手段和分析方法进行检测，结果仅供参考。

#### Standards for Cell Line Authentications

To standardize STR analysis for human cell line authentication, the American Tissue Culture Collection (ATCC) Standards Development Organization Workgroup published ASN-0002-2011, which recommends the use of at least eight STR loci (TH01, TPOX, vWA, CSF1PO, D16S539, D7S820, D13S317 and D5S818) plus Amelogenin for gender identification for human cell line authentication.

附表：细胞 HEK293 的 STR 位点和 Amelogenin 位点的基因分型结果

| 细胞 HEK293 (图片编号 XB6570) |          |          |
|-------------------------|----------|----------|
| Marker                  | Allele 1 | Allele 2 |
| D19S433                 | 15       | 18       |
| D5S818                  | 8        | 8        |
| D21S11                  | 30.2     | 30.2     |
| D18S51                  | 17       | 17       |
| D6S1043                 | 11       | 11       |
| AMEL                    | X        | X        |
| D3S1358                 | 15       | 17       |
| D13S317                 | 12       | 14       |
| D7S820                  | 11       | 11       |
| D16S539                 | 9        | 13       |
| CSF1PO                  | 12       | 12       |
| Penta D                 | 9        | 9        |
| D2S441                  | 11       | 15       |
| vWA                     | 16       | 19       |
| D8S1179                 | 12       | 14       |
| TPOX                    | 11       | 11       |
| Penta E                 | 7        | 15       |
| TH01                    | 7        | 9.3      |
| D12S391                 | 19       | 21       |
| D2S1338                 | 19       | 19       |
| FGA                     | 23       | 23       |

附图：细胞 HEK293 的 STR 分型图谱

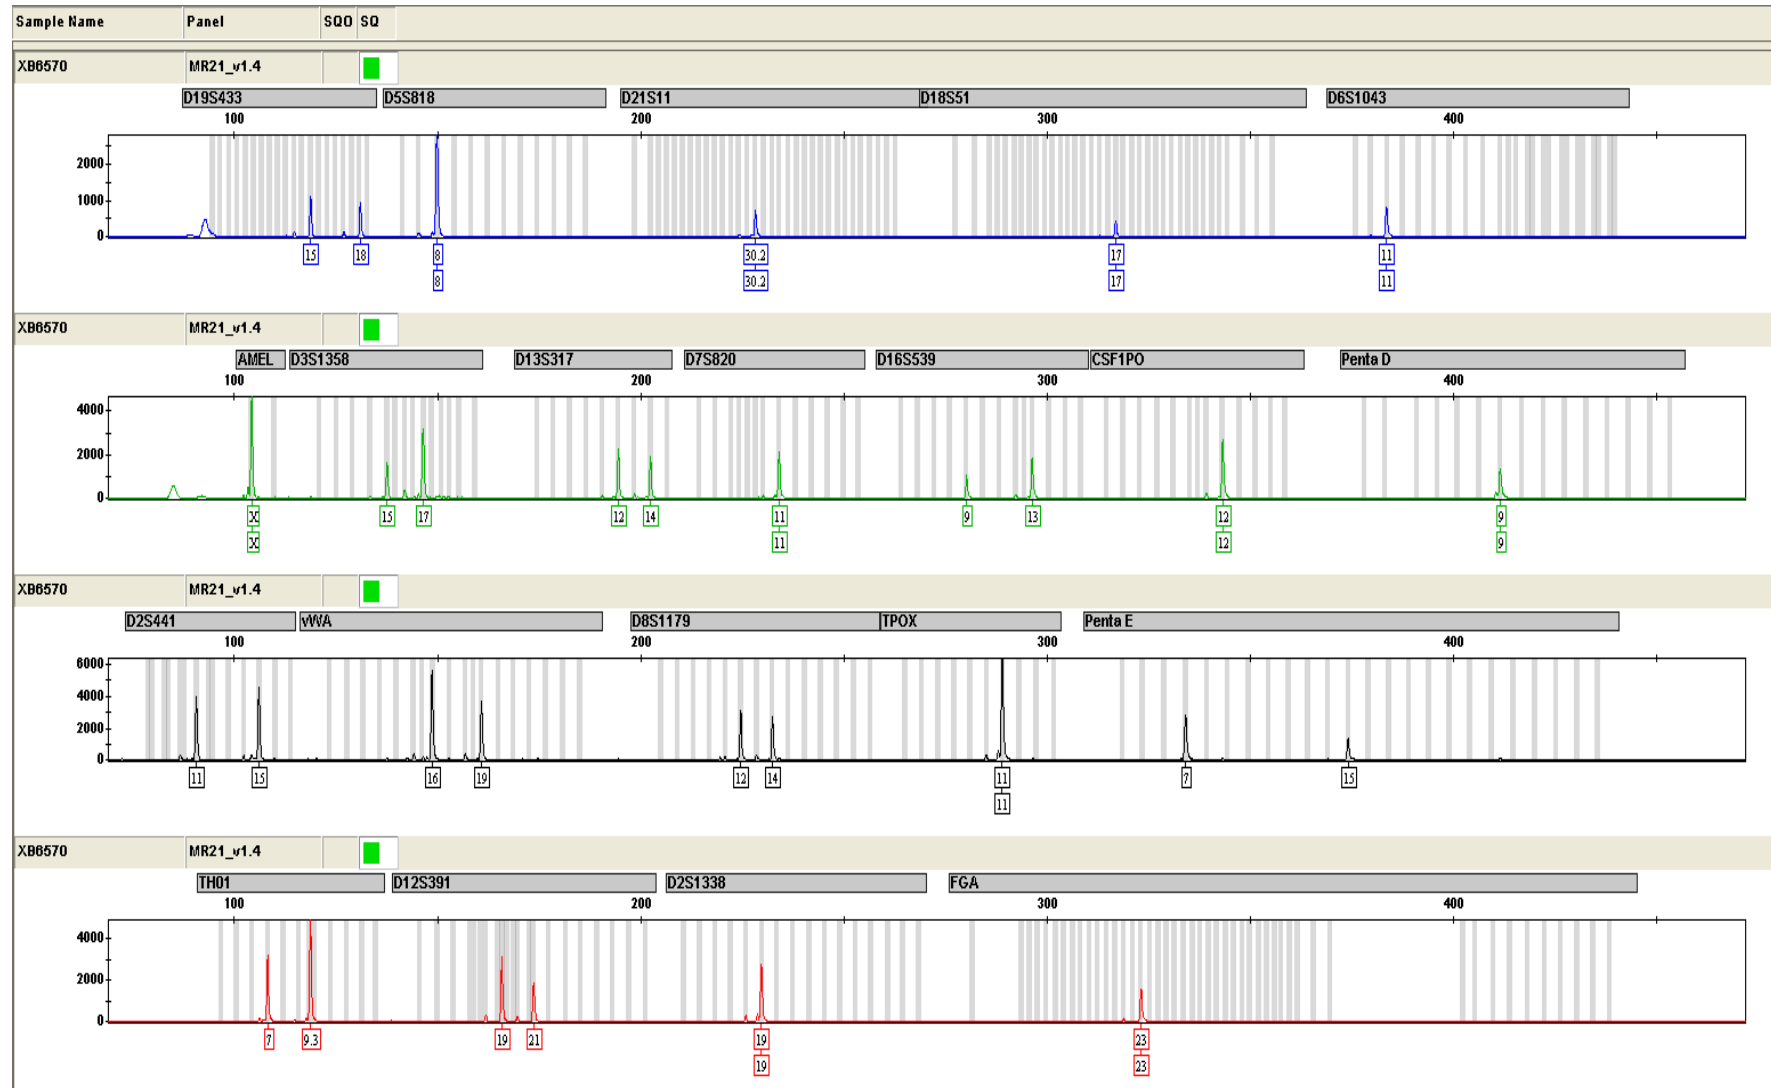



# 细胞遗传质量鉴定检测

## Cell Line Authentication Service

---

### STR 基因型检测报告

## 样品信息

样品编号:

| 客户样本编号     | 公司编号        |
|------------|-------------|
| MDA-MB-175 | 20191107-01 |

样品数量: 1

样品性状: 细胞系

**检测项目：**STR

**检测方法：**用 Axygen 的基因组抽提试剂盒提取 DNA，采用 21- STR 扩增方案扩增，在 ABI 3730XL 型遗传分析仪上对 STR 位点和性别基因 Amelogenin 进行检测。

## 检测结果

### (一) 检验基本情况

| 公司编号        | 多等位基因 | 匹配细胞系          | 细胞库  | EV 值 | 匹配说明 |
|-------------|-------|----------------|------|------|------|
| 20191107-01 | 无     | MDA-MB-175-VII | ATCC | 1.0  | 完全匹配 |

样本基因型检验结果

- 多等位基因指三等位及以上基因现象。
- 本次检测各细胞分型结果良好。

### (二) 各样本描述

- 20191107-01：该株细胞 DNA 分型在细胞系检索中找到**完全匹配**的细胞系，ATCC 数据库显示细胞名为 **MDA-MB-175-VII**，细胞号对应 **HTB-25**。本次检测在该细胞系中**没有发现多等位基因**。

**备注：**待测细胞系与收录于 ATCC, DSMZ, JCRB 和 RIKEN 数据库的细胞系 STR 数据进行比对，未收录于以上细胞库的细胞系将无法匹配。

### (三) 样本分型结果

细胞的 STR 位点和 Amelogenin 位点的基因分型结果

| Loci    | 送检细胞 STR 信息       |         |         | 细胞库细胞 STR 信息           |         |         |
|---------|-------------------|---------|---------|------------------------|---------|---------|
|         | 送检细胞名: MDA-MB-175 |         |         | 细胞库细胞名: MDA-MB-175-VII |         |         |
|         | Allele1           | Allele2 | Allele3 | Allele1                | Allele2 | Allele3 |
| D5S818  | 11                | 11      |         | 11                     | 11      |         |
| D13S317 | 11                | 12      |         | 11                     | 12      |         |
| D7S820  | 11                | 12      |         | 11                     | 12      |         |
| D16S539 | 11                | 13      |         | 11                     | 13      |         |
| VWA     | 15                | 16      |         | 15                     | 16      |         |
| TH01    | 7                 | 7       |         | 7                      | 7       |         |
| AMEL    | X                 | X       |         | X                      | X       |         |
| TPOX    | 6                 | 8       |         | 6                      | 8       |         |
| CSF1PO  | 7                 | 8       |         | 7                      | 8       |         |
| D12S391 | 18                | 20      |         |                        |         |         |
| FGA     | 23                | 26      |         |                        |         |         |
| D2S1338 | 17                | 22      |         |                        |         |         |
| D21S11  | 29                | 30      |         |                        |         |         |
| D18S51  | 15                | 15      |         |                        |         |         |
| D8S1179 | 14                | 17      |         |                        |         |         |
| D3S1358 | 16                | 18      |         |                        |         |         |
| D6S1043 | 12                | 19      |         |                        |         |         |
| PENTAE  | 8                 | 15      |         |                        |         |         |
| D19S433 | 12.2              | 15      |         |                        |         |         |
| PENTAD  | 3.2               | 11      |         |                        |         |         |
| D1S1656 | 17                | 17      |         |                        |         |         |





## ZR-75-1 细胞 STR 鉴定报告

### 一、 材料处理和检验方法

取适量 ZR-75-1 细胞( $1 \times 10^6$ )使用 PureLink® Genomic DNA Mini Kit (美国 Life K182001)提取基因组 DNA, 采用 PowerPlex®18D 系统(美国 Promega DC1802)试剂盒进行扩增, 在 ABI3500 Genetic Analyzer (美国 Life3500) 进行检测。

### 二、 检测结果

实验中阴性及阳性对照结果均正确。

ZR-75-1 细胞株的 STR 位点和 Amelogenin 位点的基因分型结果见附表, 分型图谱见附图。

### 三、 分析说明

ZR-75-1 细胞株基因组 DNA 扩增后图谱清晰, 分型结果良好。

### 四、 检验结论

1. ZR-75-1 细胞株 DNA 进行细胞 STR 分型结果显示, 细胞株中未发现人类细胞交叉污染。
2. 该细胞株 DNA 分型在 ATCC 细胞库中找到与其细胞分型 100%相匹配的细胞株, 细胞株名称为 ZR-75-1。

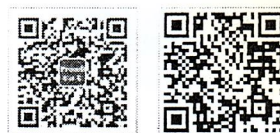



武汉普诺赛生命科技有限公司  
Procell Life Science&Technology Co.,Ltd.

附表 1: 细胞株 ZR-75-1 的 STR 位点和 Amelogenin 位点的基因分型结果

| 细胞 ZR-75-1 (图片编号为 PC91) |          |          |
|-------------------------|----------|----------|
| Marker                  | Allele 1 | Allele 2 |
| D3S1358                 | 15       | 16       |
| TH01                    | 7        | 9.3      |
| D21S11                  | 31       | 31       |
| D18S51                  | 13       | 14       |
| Penta E                 | 7        | 14       |
| D5S818                  | 13       | 13       |
| D13S317                 | 9        | 9        |
| D7S820                  | 10       | 11       |
| D16S539                 | 11       | 11       |
| CSF1PO                  | 10       | 11       |
| Penta D                 | 14       | 14       |
| AMEL                    | X        | X        |
| vWA                     | 16       | 18       |
| D8S1179                 | 11       | 13       |
| TPOX                    | 8        | 8        |
| FGA                     | 20       | 22       |
| D6S1043                 | 12       | 12       |
| D2S1338                 | 16       | 25       |
| D12S391                 | 21       | 21       |
| D19S433                 | 13       | 14       |
| D1S1656                 | 16.3     | 16.3     |

附图 1: ATCC 官网 ZR-75-1 细胞 STR 位点信息

## ZR-75-1 (ATCC® CRL-1500™)

Organism: Homo sapiens, human / Cell Type: epithelial / Tissue: mammary gland  
Disease: ductal carcinoma

| GENERAL INFORMATION | CHARACTERISTICS                                                                                                                    | CULTURE METHOD | SPECIFICATIONS |
|---------------------|------------------------------------------------------------------------------------------------------------------------------------|----------------|----------------|
| STR Profile         | Amelogenin: X<br>CSF1PO: 10/11<br>D13S317: 9<br>D16S539: 11<br>D5S818: 13<br>D7S820: 10/11<br>TH01: 7/9.3<br>TPOX: 8<br>vWA: 16/18 |                |                |

网站: [www.procell.com.cn](http://www.procell.com.cn)  
电话: 400-650-3656  
邮箱: [sales@procell.com.cn](mailto:sales@procell.com.cn)

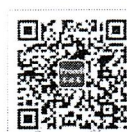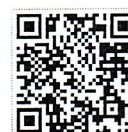

附图 2: ZR-75-1 细胞 STR 位点和 Amelogenin 位点的基因分型结果

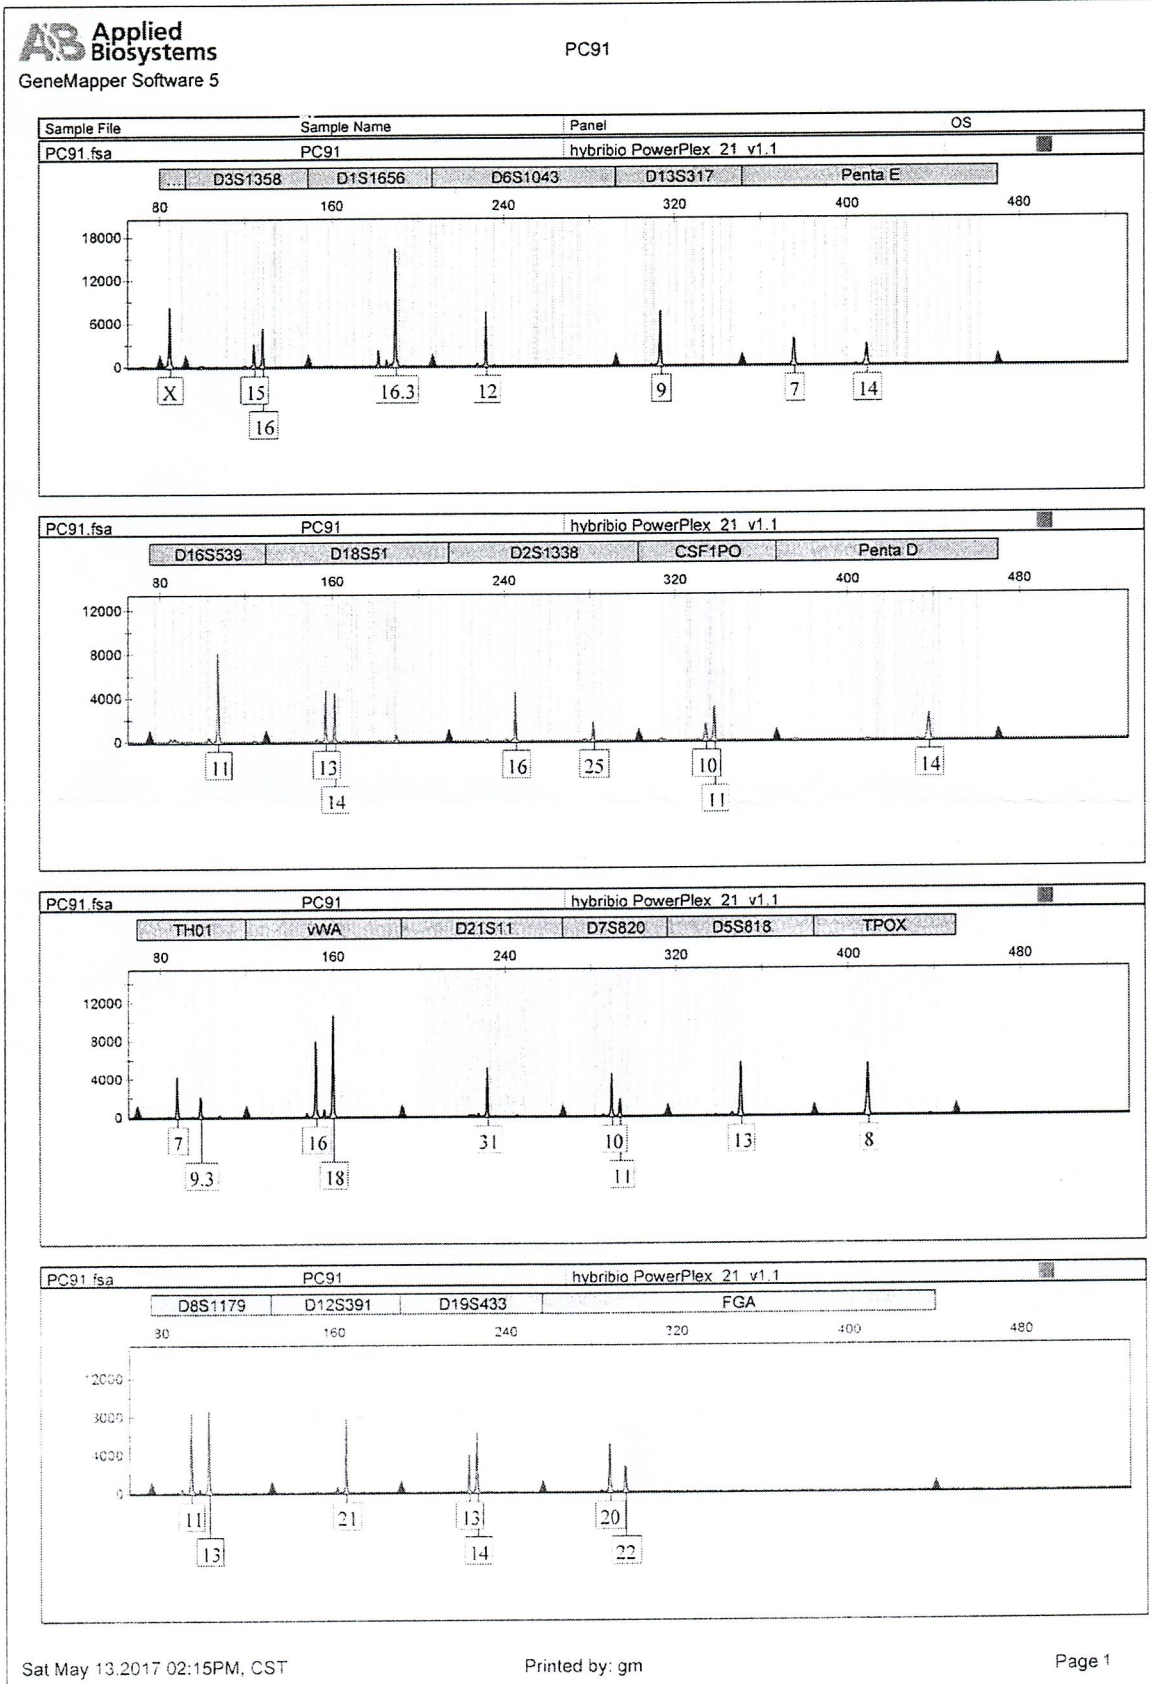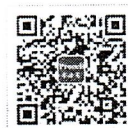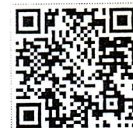

Supplement: 41419_2022_4604_MOESM8_ESM.pdf [file 41419_2022_4604_MOESM8_ESM.pdf]
