# Supplementary material for: Regulation of P53 signaling in breast cancer by the E3 ubiquitin ligase RNF187
Source: PubMed Central journal article supplement (PMC8844070; doi:10.1038/s41419-022-04604-3), 2022-02-14
Supplement: 41419_2022_4604_MOESM7_ESM.pdf [file 41419_2022_4604_MOESM7_ESM.pdf]

# Figure 1E

| <b>Time(h)</b> | <b>siControl</b> |          |          | <b>siRNF187#1</b> |          |          | <b>siRNF187#2</b> |          |          |
|----------------|------------------|----------|----------|-------------------|----------|----------|-------------------|----------|----------|
| 0              | 0.997802         | 0.993407 | 1.008791 | 1.079727          | 0.958998 | 0.961276 | 1.088847          | 0.952741 | 0.960302 |
| 24             | 5.512088         | 5.784615 | 5.096703 | 3.57631           | 3.553531 | 3.46697  | 3.018904          | 2.89225  | 2.924386 |
| 48             | 14.84835         | 13.61538 | 15.94505 | 7.826879          | 9.330296 | 9.277904 | 5.975425          | 6.517958 | 7.047259 |
| 72             | 18.01978         | 19.05714 | 19.53846 | 12.79954          | 13.84282 | 14.01139 | 10.99055          | 10.42911 | 11.55577 |

**Figure 1F**

| <b>Time(h)</b> | <b>siControl</b> |          |          | <b>siRNF187#1</b> |          |          | <b>siRNF187#2</b> |          |          |
|----------------|------------------|----------|----------|-------------------|----------|----------|-------------------|----------|----------|
| 0              | 0.876834         | 1.040389 | 1.082792 | 0.979312          | 0.932752 | 1.087952 | 1.065914          | 0.862797 | 1.071307 |
| 24             | 4.874835         | 4.023346 | 4.803659 | 2.70824           | 3.758527 | 3.287135 | 2.794625          | 2.820269 | 3.420632 |
| 48             | 13.46741         | 13.94909 | 13.08412 | 8.542671          | 7.943135 | 8.037807 | 6.679489          | 7.622332 | 7.233117 |
| 72             | 17.99079         | 17.06065 | 17.00295 | 9.729486          | 10.07248 | 9.065439 | 7.97728           | 7.073981 | 8.106699 |

# Figure 1G

| <b>Time(h)</b> | <b>siControl</b> |          |          | <b>siRNF187#1</b> |          |          | <b>siRNF187#2</b> |          |          |
|----------------|------------------|----------|----------|-------------------|----------|----------|-------------------|----------|----------|
| 0              | 0.906588         | 1.087906 | 1.005489 | 0.914443          | 1.010701 | 1.074872 | 0.914443          | 1.010701 | 1.074872 |
| 24             | 5.431289         | 5.497223 | 5.068653 | 2.600552          | 3.096809 | 3.296809 | 2.719266          | 3.096809 | 2.655094 |
| 48             | 8.2472           | 9.999951 | 9.27468  | 3.518202          | 3.834245 | 4.555102 | 3.799488          | 3.27596  | 3.255102 |
| 72             | 14.96146         | 13.79114 | 13.4285  | 7.272217          | 7.156174 | 7.936388 | 5.65779           | 6.571161 | 6.042818 |

**Figure 1L**

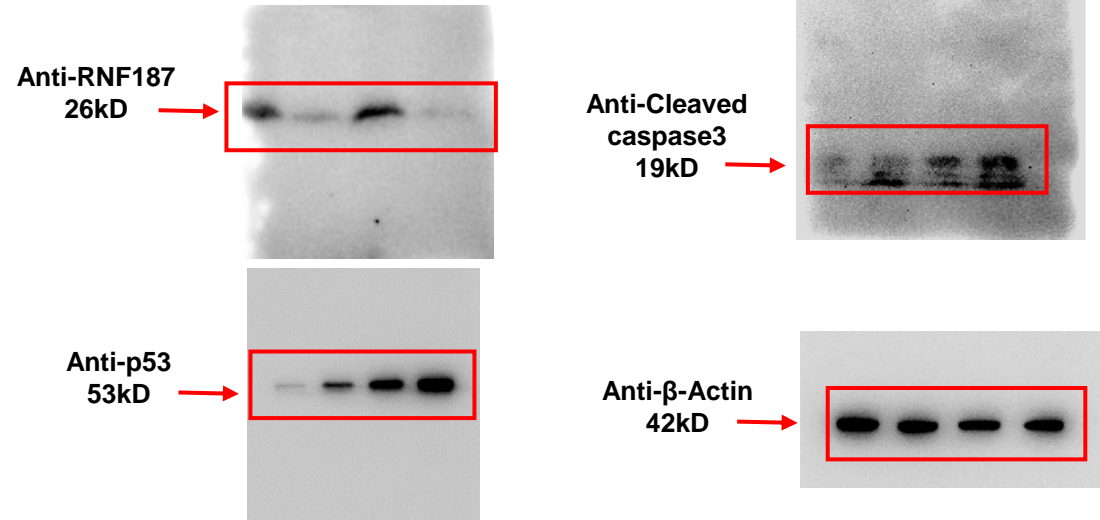

**Figure 1M**

| <b>Cisplatin(<math>\mu</math>M)</b> | <b>siControl</b> |          |          | <b>siRNF187</b> |          |          |
|-------------------------------------|------------------|----------|----------|-----------------|----------|----------|
| 0                                   | 0.997738         | 1.013575 | 0.988688 | 0.959415        | 1.005681 | 1.034902 |
| 8                                   | 0.911765         | 0.9819   | 0.900452 | 0.762175        | 0.854707 | 0.896103 |
| 16                                  | 0.760181         | 0.841629 | 0.825792 | 0.513473        | 0.498863 | 0.436688 |
| 24                                  | 0.640271         | 0.696833 | 0.723982 | 0.38198         | 0.335551 | 0.320941 |
| 32                                  | 0.588235         | 0.717195 | 0.656109 | 0.287889        | 0.225454 | 0.215714 |
| 40                                  | 0.579186         | 0.508597 | 0.447059 | 0.128052        | 0.187013 | 0.127532 |

**Figure 3A**

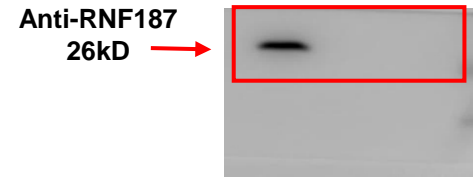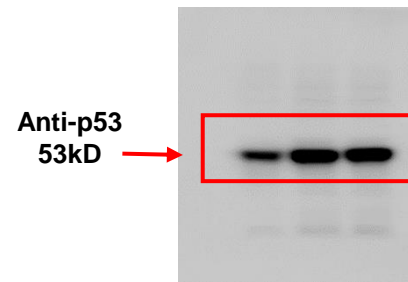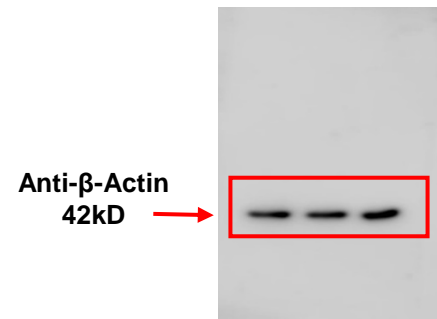

**Figure 3C**

|         | siControl |          |          | siRNF187#1 |          |          | siRNF187#2 |          |          |
|---------|-----------|----------|----------|------------|----------|----------|------------|----------|----------|
| P53INP1 | 1.059496  | 0.915138 | 1.025197 | 4.239294   | 4.210344 | 3.748905 | 3.787398   | 2.916964 | 3.29404  |
| P21     | 1.065213  | 0.996435 | 0.938465 | 2.581142   | 3.170254 | 3.424896 | 4.03974    | 5.30264  | 5.2457   |
| BTG2    | 0.965079  | 1.001775 | 1.032704 | 3.347953   | 2.448265 | 2.560149 | 4.945892   | 5.02047  | 5.460678 |
| BAX     | 0.984316  | 0.994979 | 1.020656 | 3.065587   | 2.978539 | 2.820568 | 3.827283   | 3.441747 | 3.665992 |

**Figure 3D**

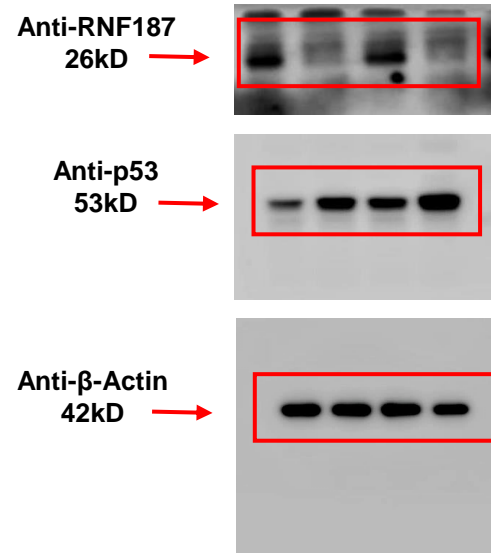



**Figure 3E**

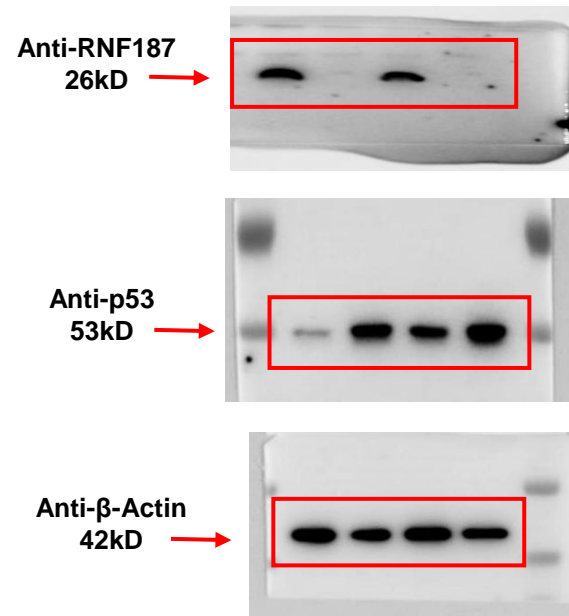

**Figure 3F**

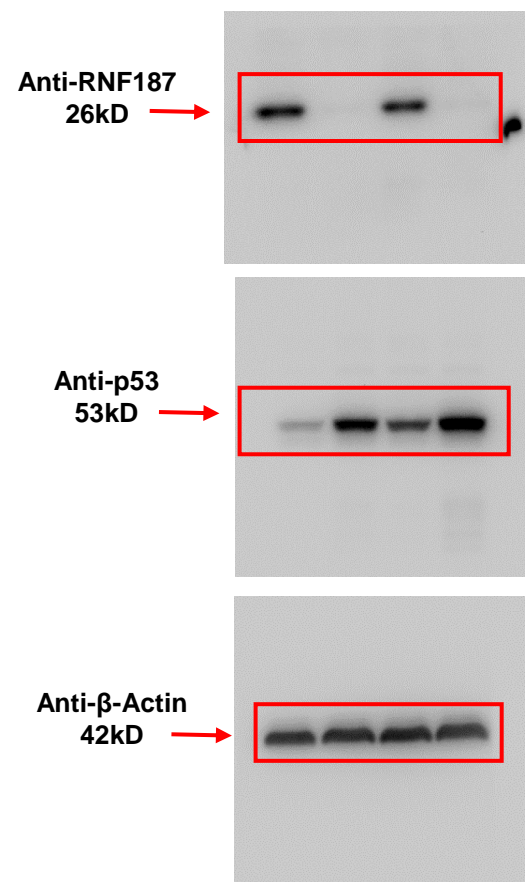

**Figure 3G**

|         | siControl+Vehicle |          |          | siRNF187+Vehicle |          |          | siControl+Cisplatin |          |          | siRNF187+Cisplatin |          |          |
|---------|-------------------|----------|----------|------------------|----------|----------|---------------------|----------|----------|--------------------|----------|----------|
| P53INP1 | 1.009345          | 0.945824 | 1.044323 | 2.207663         | 2.12139  | 2.145905 | 2.661142            | 2.448007 | 2.6681   | 3.85178            | 3.813115 | 3.887684 |
| P21     | 1.089362          | 1.005184 | 0.905442 | 2.259027         | 2.375903 | 2.580061 | 5.483117            | 5.611781 | 4.836528 | 9.86715            | 8.364579 | 8.021797 |
| BTG2    | 1.003413          | 0.977975 | 1.018375 | 3.2013           | 3.130099 | 3.180334 | 3.393154            | 3.486725 | 3.578999 | 5.832558           | 5.990349 | 6.02134  |
| BAX     | 1.08677           | 1.026162 | 0.887156 | 2.435925         | 2.314966 | 2.650207 | 2.204112            | 2.205415 | 2.125169 | 4.04383            | 4.088491 | 4.07262  |

# Figure 3H

|         | siControl+Vehicle |          |          | siRNF187+Vehicle |          |          | siControl+Cisplatin |          |          | siRNF187+Cisplatin |          |          |
|---------|-------------------|----------|----------|------------------|----------|----------|---------------------|----------|----------|--------------------|----------|----------|
| P53INP1 | 1.022256          | 1.022322 | 0.955653 | 8.376135         | 8.496781 | 7.774995 | 2.288713            | 2.237563 | 2.119314 | 10.50461           | 10.04416 | 10.63484 |
| P21     | 0.911369          | 1.073152 | 1.015503 | 4.102641         | 3.690866 | 3.259424 | 2.334243            | 2.230405 | 2.302885 | 11.54561           | 9.652185 | 9.725313 |
| BTG2    | 1.05639           | 0.966567 | 0.97713  | 5.11737          | 4.165703 | 4.240725 | 2.001815            | 1.957957 | 1.867986 | 5.903262           | 5.867633 | 5.870046 |
| BAX     | 0.990161          | 1.03614  | 0.973687 | 2.269149         | 2.139396 | 2.089649 | 1.780737            | 1.748049 | 1.813424 | 8.38568            | 7.789322 | 7.764153 |

# Figure 3I

|         | siControl+Vehicle |          |          | siRNF187+Vehicle |          |          | siControl+Cisplatin |          |          | siRNF187+Cisplatin |          |          |
|---------|-------------------|----------|----------|------------------|----------|----------|---------------------|----------|----------|--------------------|----------|----------|
| P53INP1 | 0.970203          | 1.085027 | 0.94477  | 1.93498          | 1.76653  | 1.917415 | 2.425986            | 2.958953 | 2.912351 | 4.455044           | 4.611294 | 4.510123 |
| P21     | 1.103026          | 0.903503 | 0.993471 | 3.290732         | 4.741678 | 3.651392 | 4.579904            | 4.565549 | 5.686492 | 7.901556           | 8.116201 | 8.212242 |
| BTG2    | 1.048922          | 1.046612 | 0.904466 | 4.088145         | 5.401432 | 4.172018 | 3.124812            | 2.699217 | 3.586869 | 7.294384           | 7.026983 | 6.69265  |
| BAX     | 1.011771          | 1.01907  | 0.969161 | 1.629523         | 2.20748  | 1.700421 | 1.528955            | 1.755337 | 1.788532 | 3.194541           | 3.463812 | 3.191474 |

**Figure 4A**

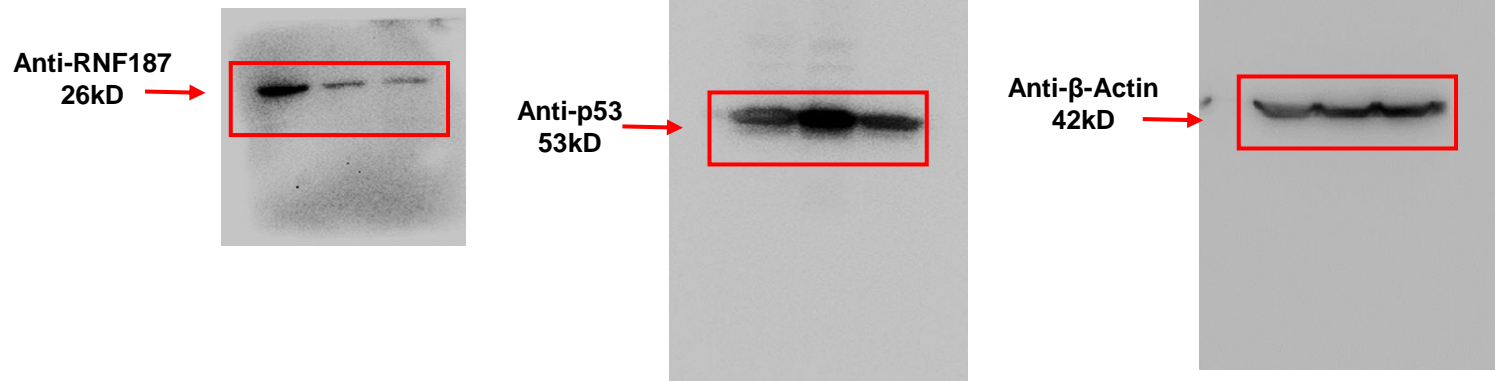

**Figure 4B**

|      | siControl+siControl |          |          | siRNF187+siControl |          |          | siRNF187+siP53 |          |          |
|------|---------------------|----------|----------|--------------------|----------|----------|----------------|----------|----------|
| BTG2 | 0.966021            | 1.011139 | 0.985139 | 1.84288            | 2.02803  | 2.213181 | 1.055961       | 1.019476 | 1.32231  |
| BAX  | 0.791689            | 1.124834 | 1.012874 | 2.138436           | 2.088758 | 2.57721  | 1.455227       | 1.339088 | 1.299747 |
| P21  | 0.984431            | 0.92889  | 1.054992 | 2.911658           | 2.407338 | 2.659498 | 1.312304       | 1.19282  | 1.089888 |

**Figure 4C**

| <b>Time(h)</b> | <b>siControl+siControl</b> |          |          | <b>siRNF187+siControl</b> |          |          | <b>siRNF187+siP53</b> |          |          |
|----------------|----------------------------|----------|----------|---------------------------|----------|----------|-----------------------|----------|----------|
| 0              | 0.979664                   | 0.905377 | 1.114973 | 0.933897                  | 1.106072 | 0.960031 | 0.948364              | 1.038484 | 1.013138 |
| 24             | 4.952045                   | 4.814083 | 5.202765 | 1.775557                  | 1.429669 | 1.114374 | 2.973936              | 3.275272 | 3.986369 |
| 48             | 9.023255                   | 8.39492  | 9.252749 | 2.634896                  | 2.934743 | 2.198155 | 6.965938              | 6.87441  | 5.945055 |
| 72             | 14.32949                   | 13.04803 | 13.23243 | 4.672175                  | 3.752498 | 3.935434 | 9.782165              | 9.690637 | 8.761283 |



**Figure 5B**

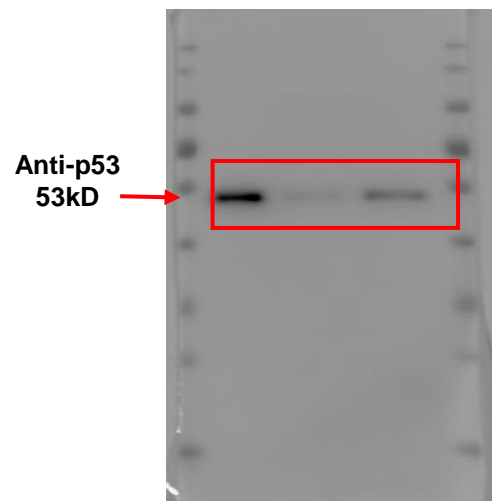

**Figure 5C**

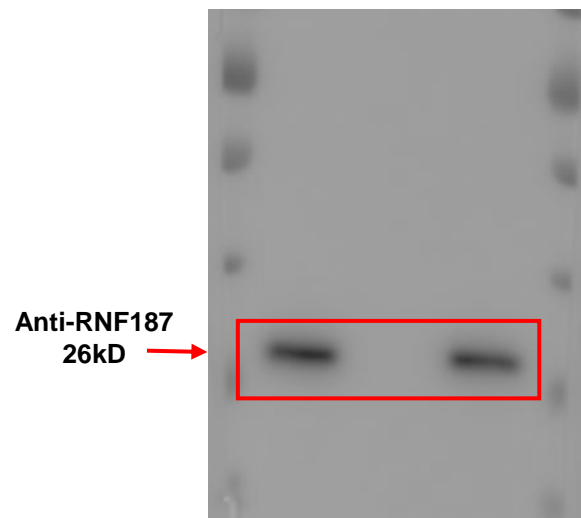

**Figure 5D**

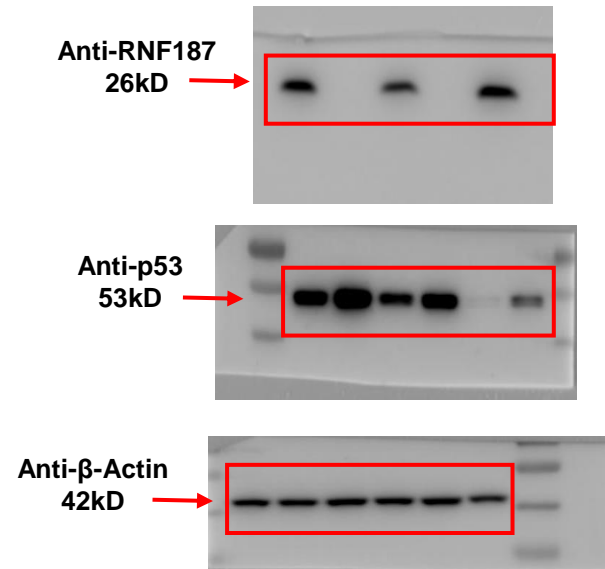

**Figure 5E**

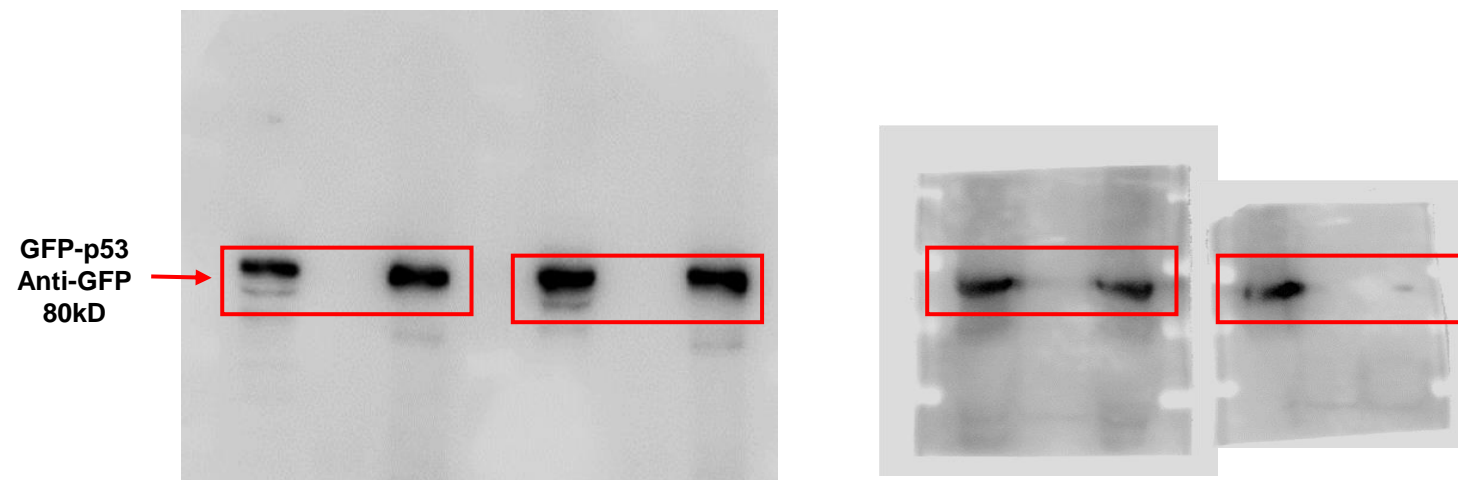

**Figure 5G**

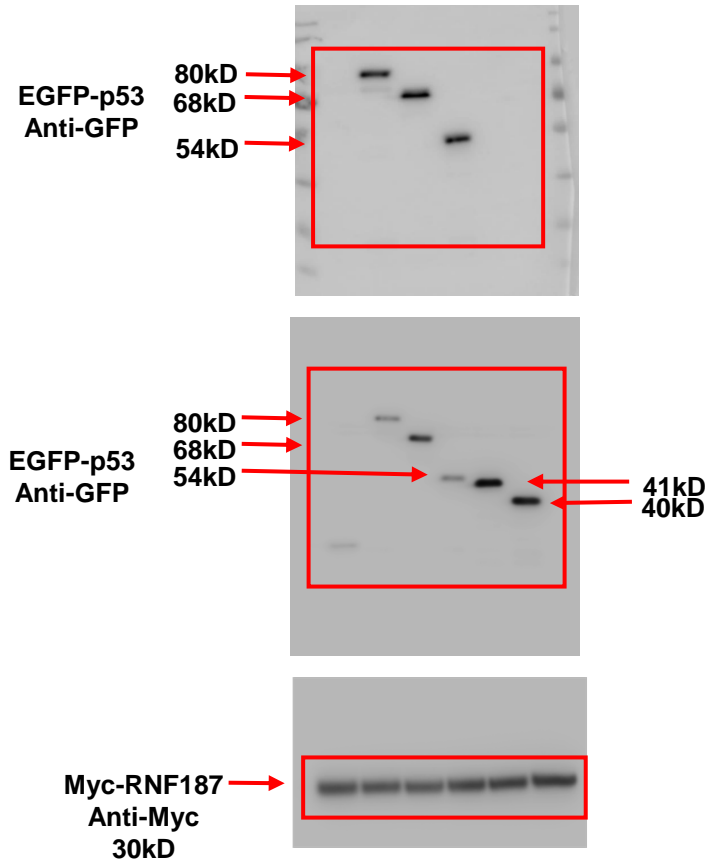

**Figure 5H**

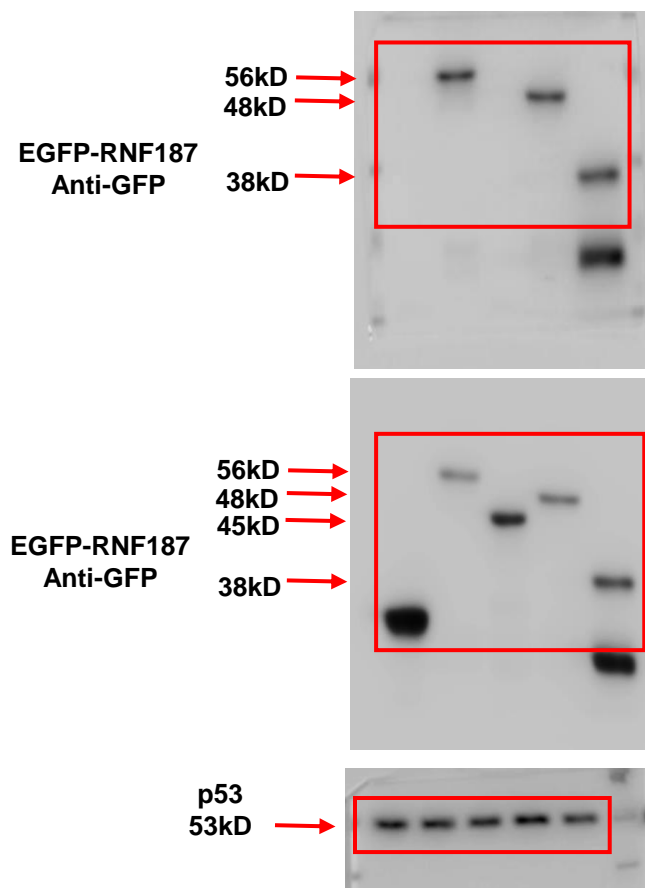

**Figure 6A**

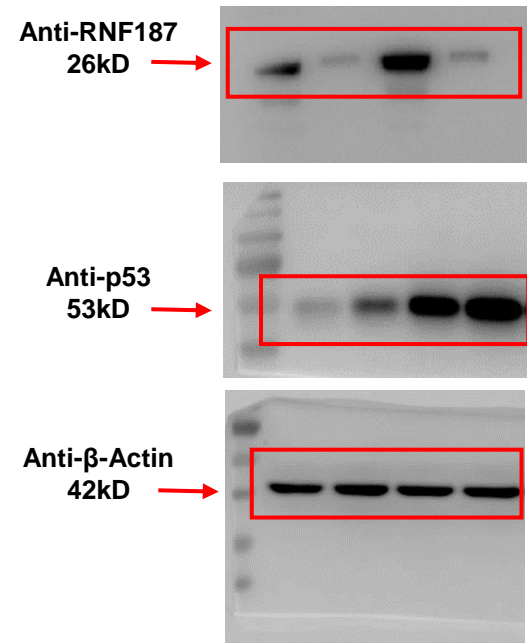

**Figure 6B**

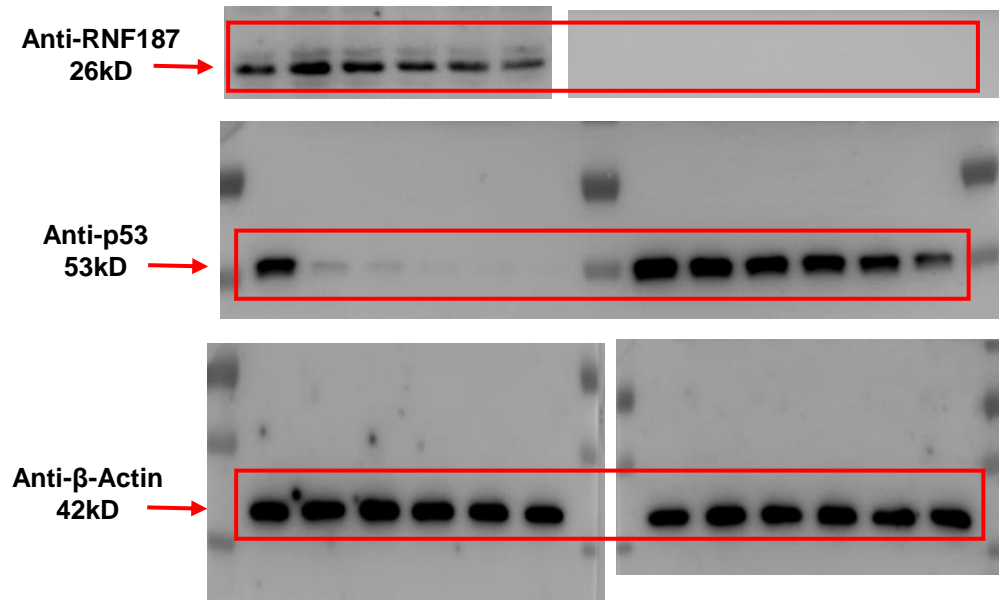



**Figure 6D**

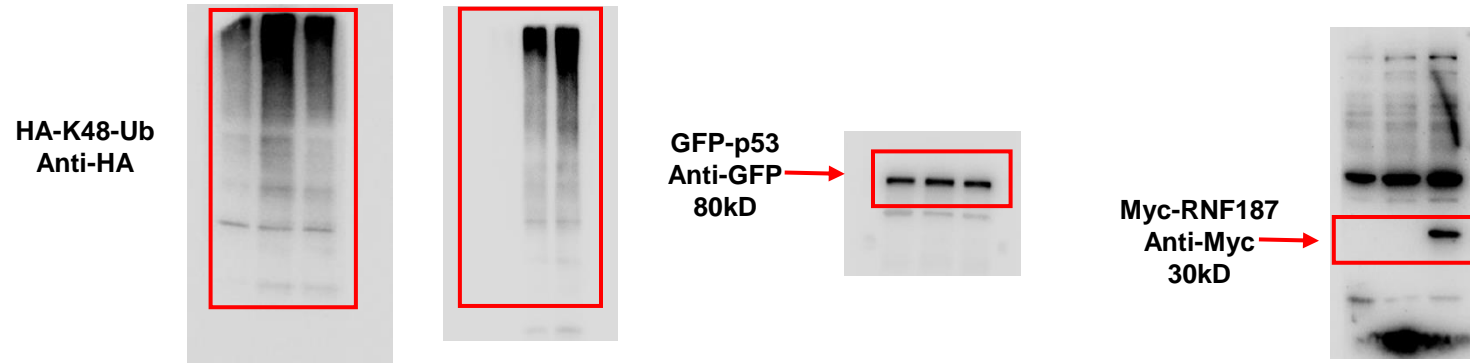

**Figure 6E**

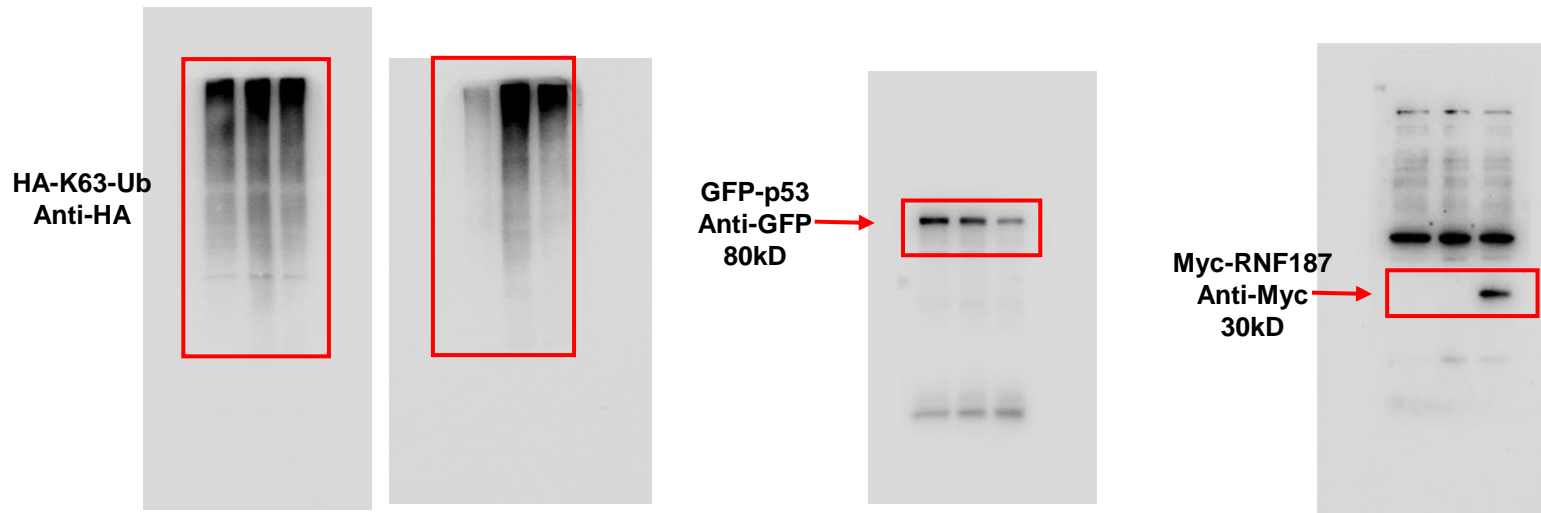

**Figure 6F**

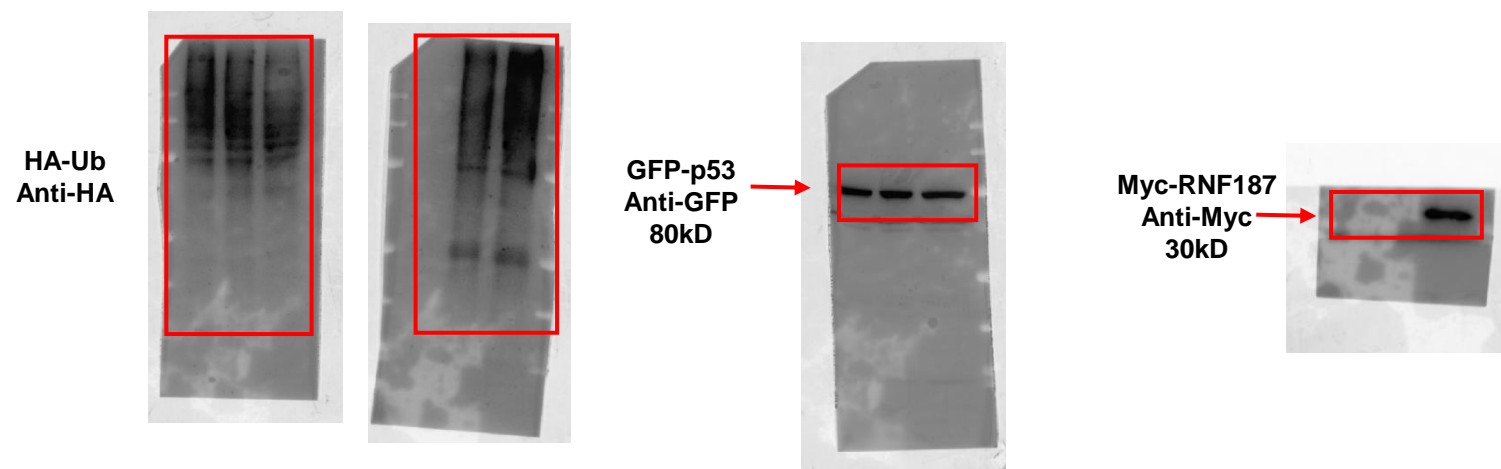

**Figure 6H**

HA-Ub  
Anti-HA

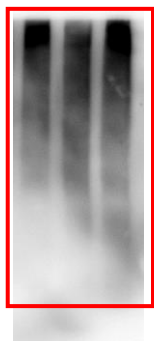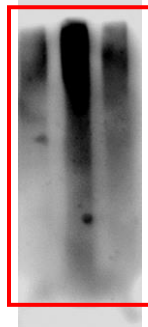

GFP-p53  
Anti-GFP  
80kD

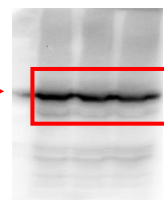

Myc-RNF187 WT  
Myc-RNF187 RM  
Anti-Myc  
30kD

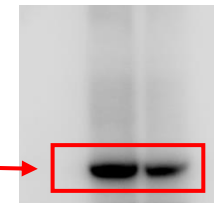

**Figure 6I**

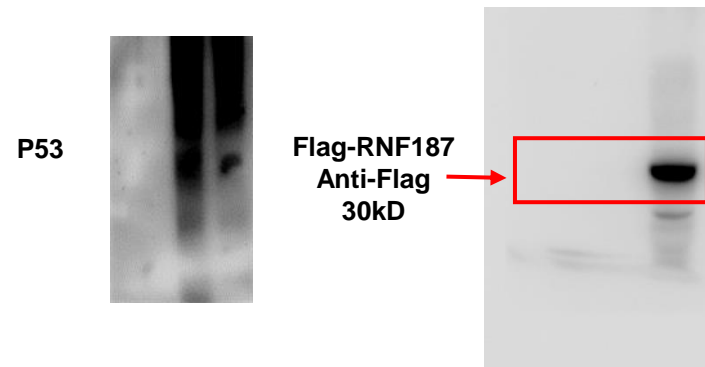

## Supplementary Figure 3A

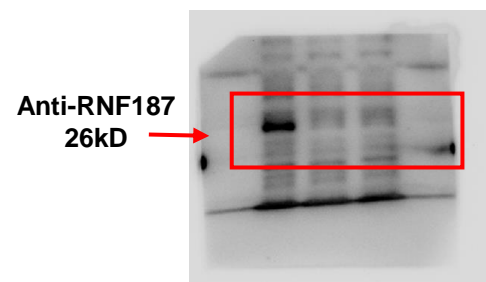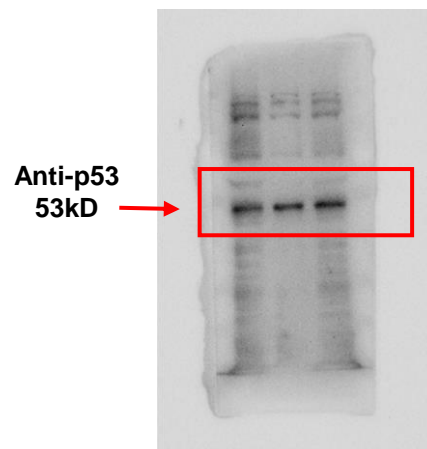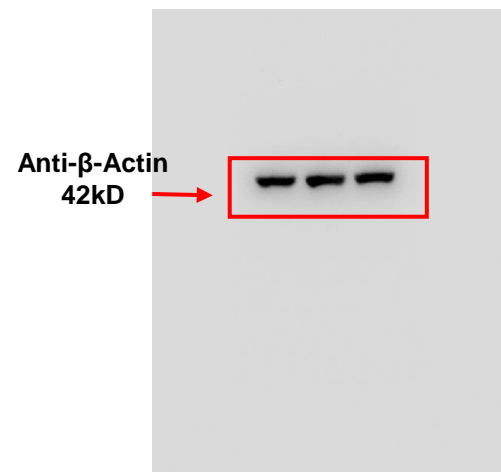

## Supplementary Figure 3C

| <b>Time(h)</b> | <b>siControl</b> |          |          | <b>siRNF187#1</b> |          |          | <b>siRNF187#2</b> |          |          |
|----------------|------------------|----------|----------|-------------------|----------|----------|-------------------|----------|----------|
| 0              | 1.198083         | 0.753994 | 1.047923 | 1.197026          | 0.929368 | 0.873606 | 0.716157          | 1.358079 | 0.925764 |
| 24             | 3.102236         | 4.166134 | 4.159744 | 3.092937          | 2.594796 | 2.992565 | 2.541485          | 2.982533 | 3.052402 |
| 48             | 7                | 9.776358 | 8.715655 | 6.32342           | 7.100372 | 7.327138 | 6.676856          | 6.131004 | 7.340611 |
| 72             | 12.63791         | 13.95101 | 12.41427 | 12.36307          | 11.42999 | 10.66791 | 10.60116          | 10.77584 | 11.43086 |
